# Supplementary figures and images for: Quality Control Platform for the Standardization of a Regenerative Medicine Product
Source: MDPI journal article supplement (doi:10.3390/bioengineering9040142), 2022-03-28

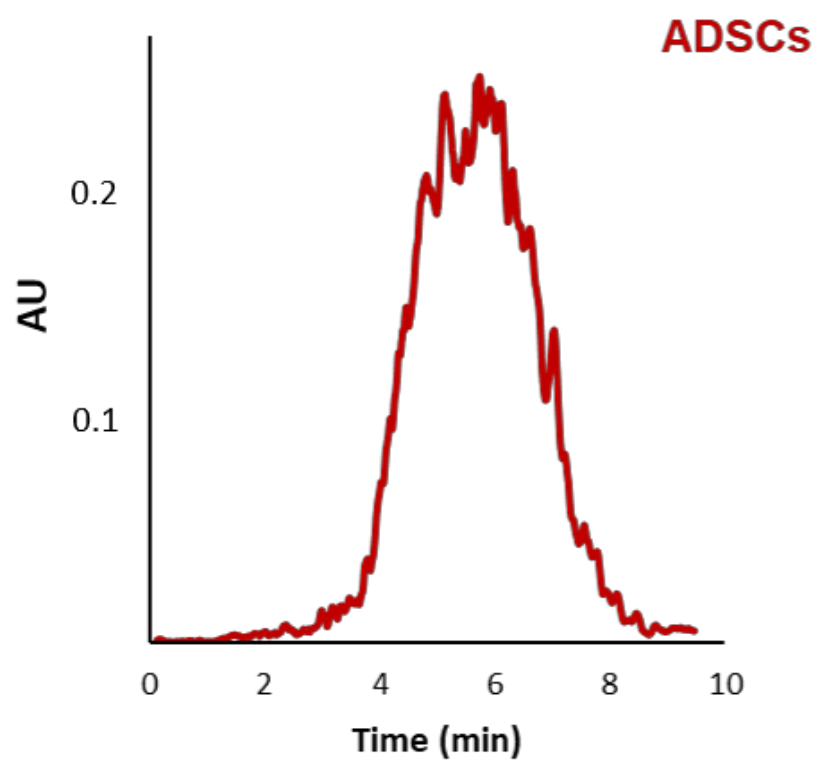

**Figure S1.** Representative fractogram of expanded ASCs.

Supplement: s1 [file s1]
